# Supplementary material for: Mitochondrial genome evolution in parasitic plants
Source: PubMed Central journal article supplement (PMC6454704; doi:10.1186/s12862-019-1401-8), 2019-04-08

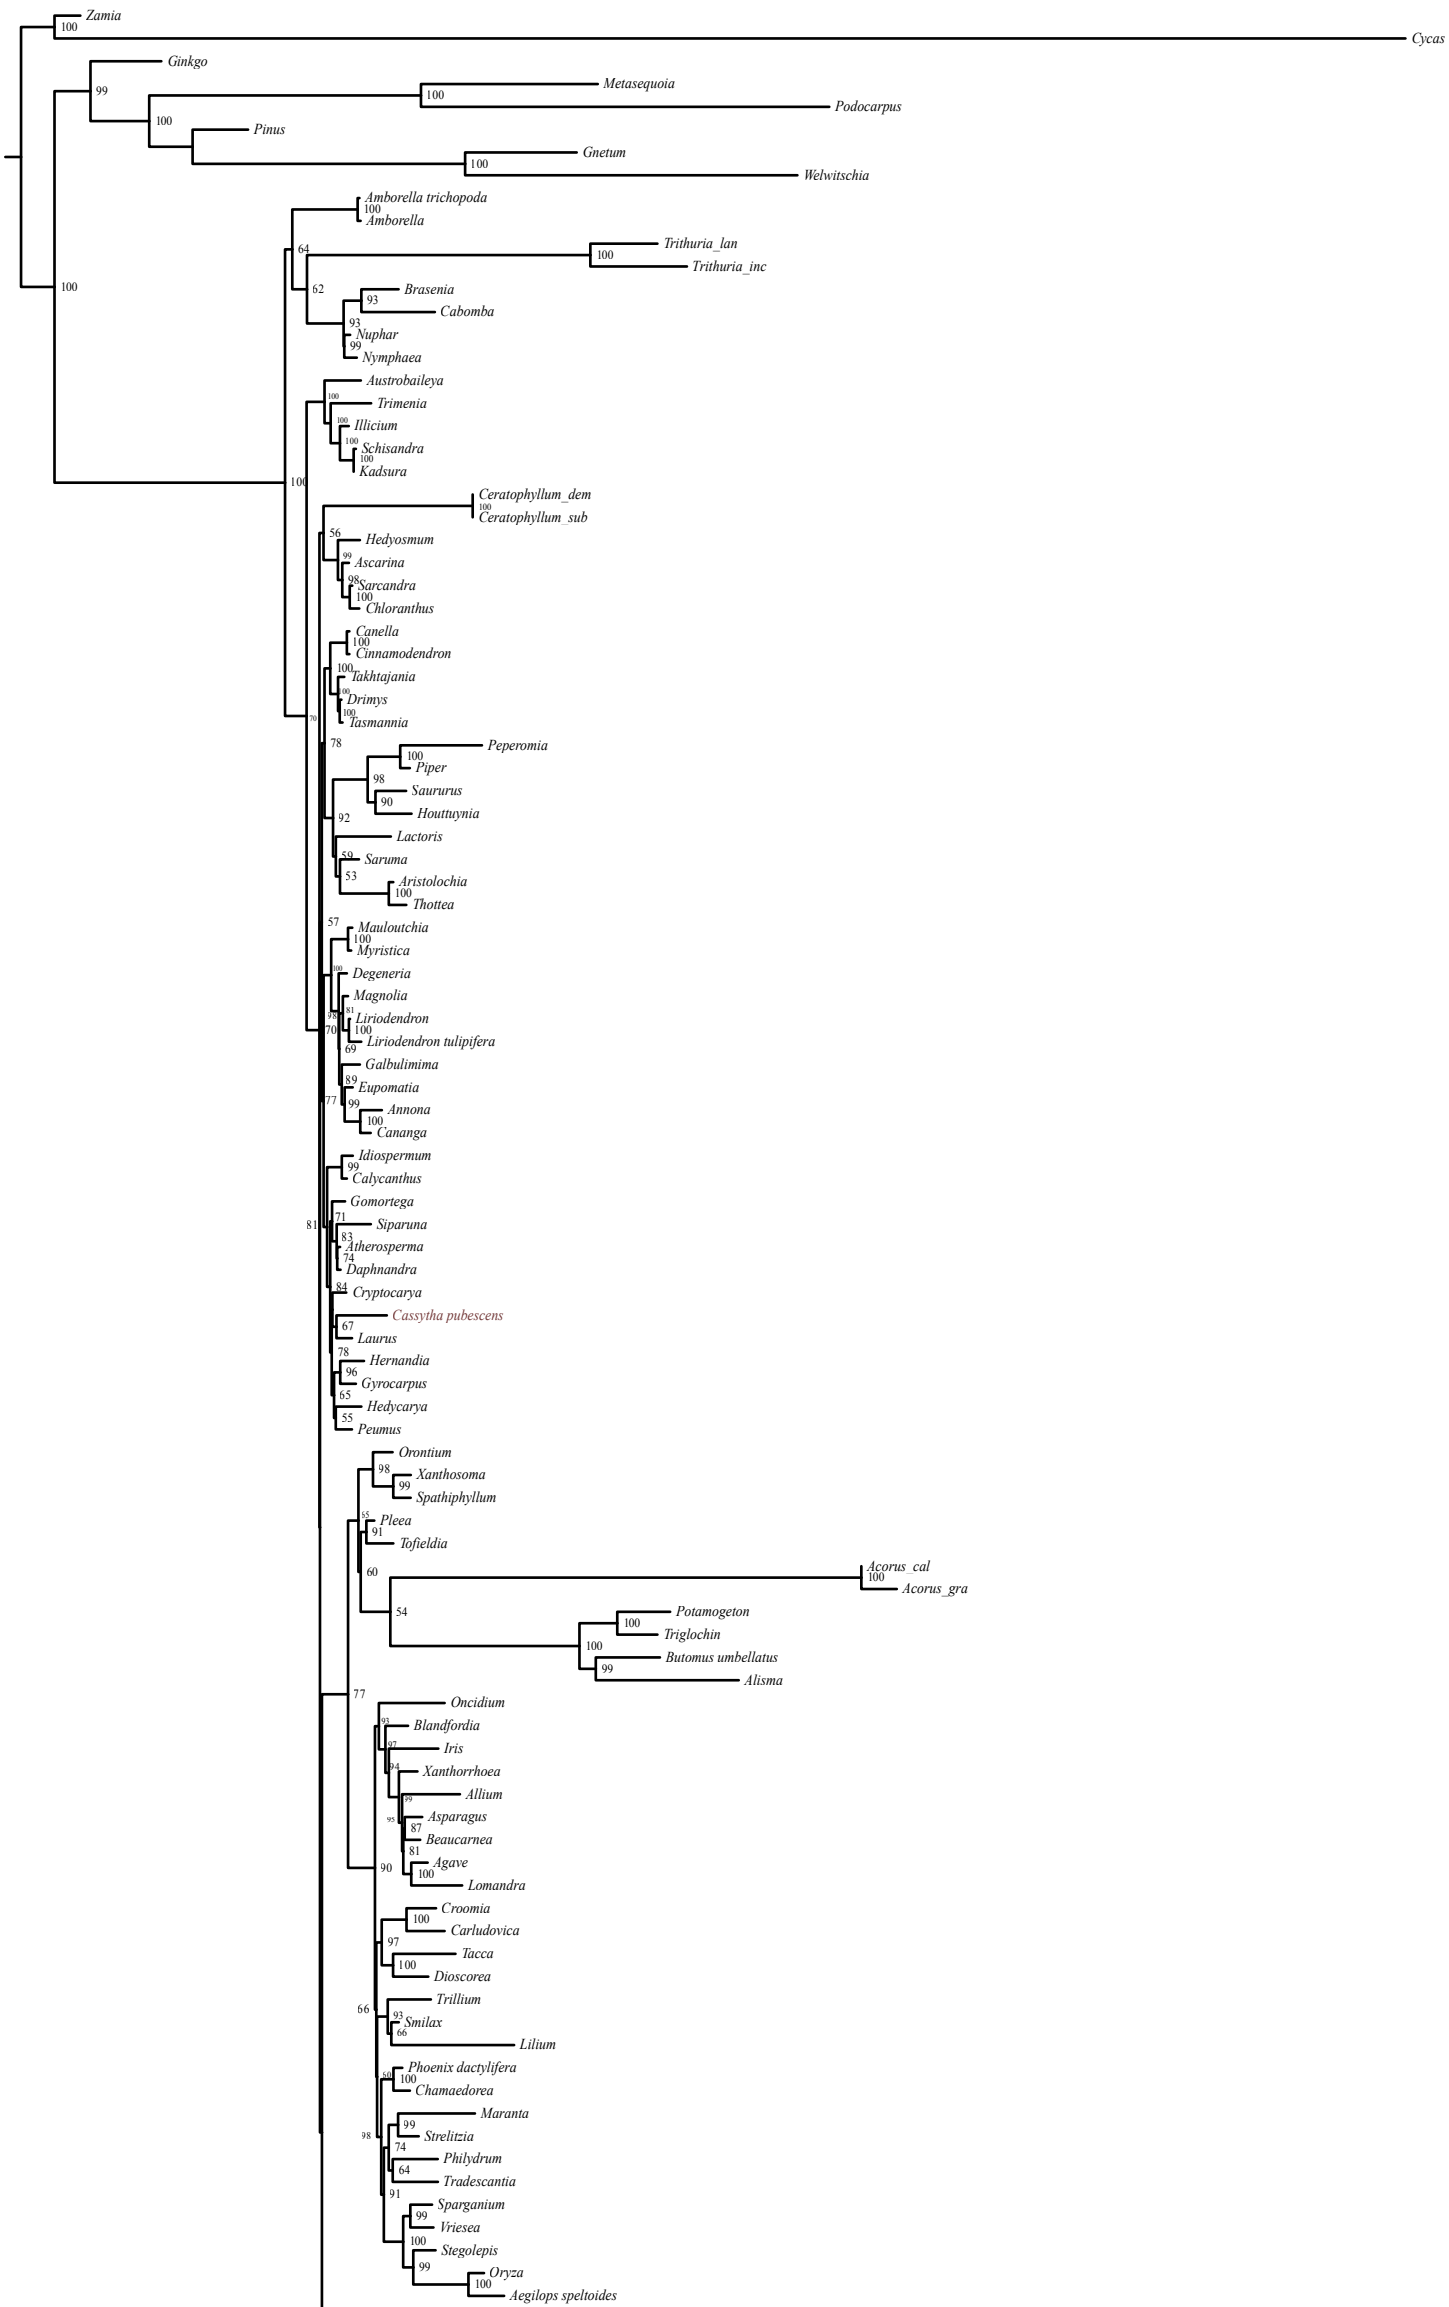

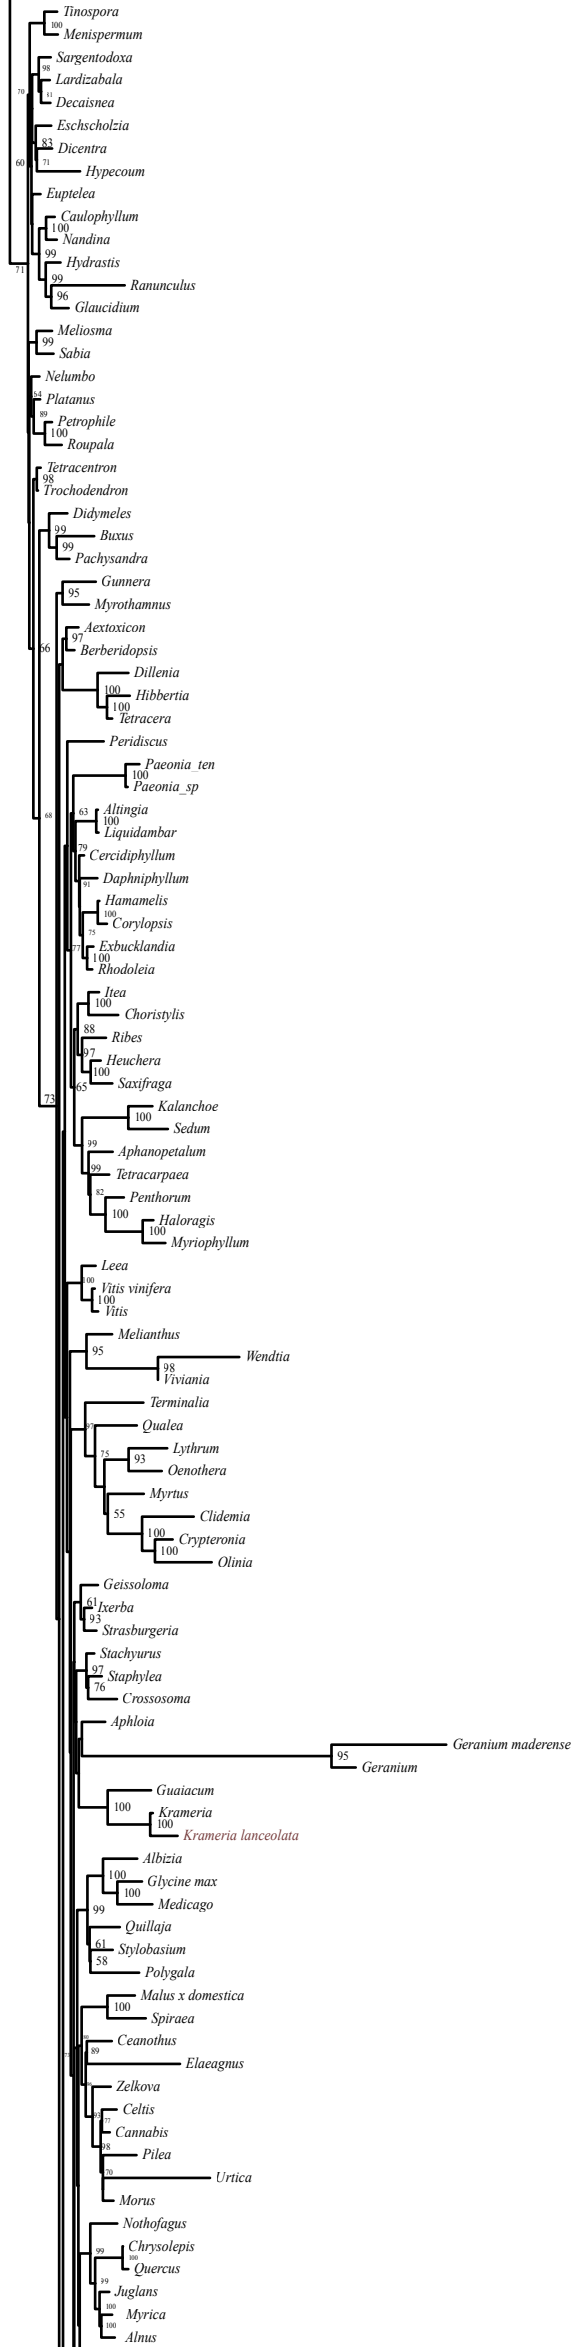

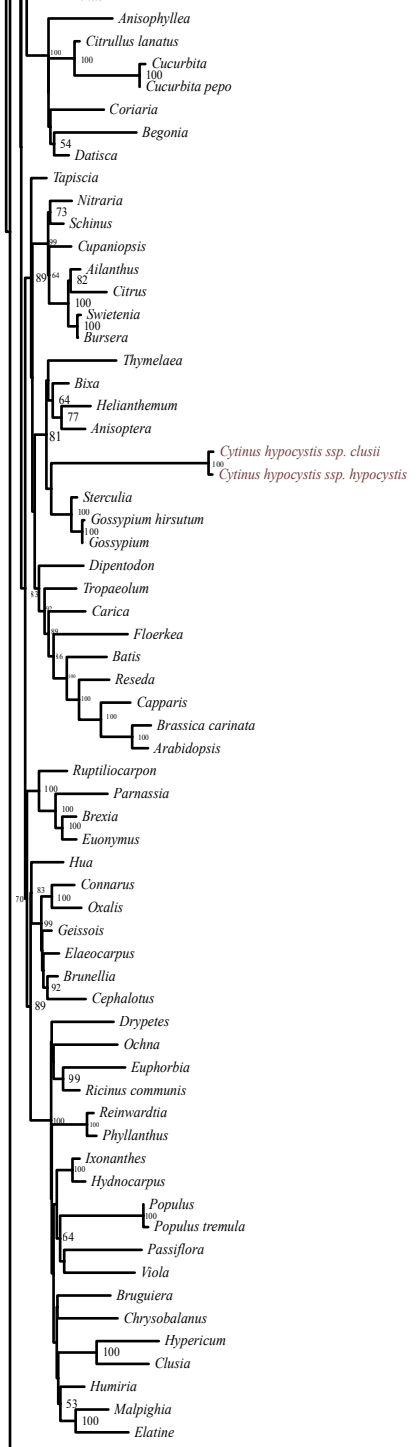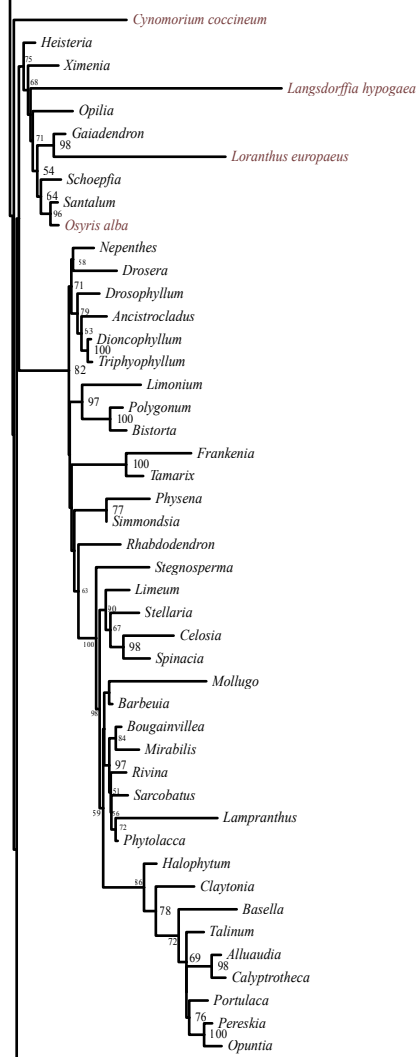

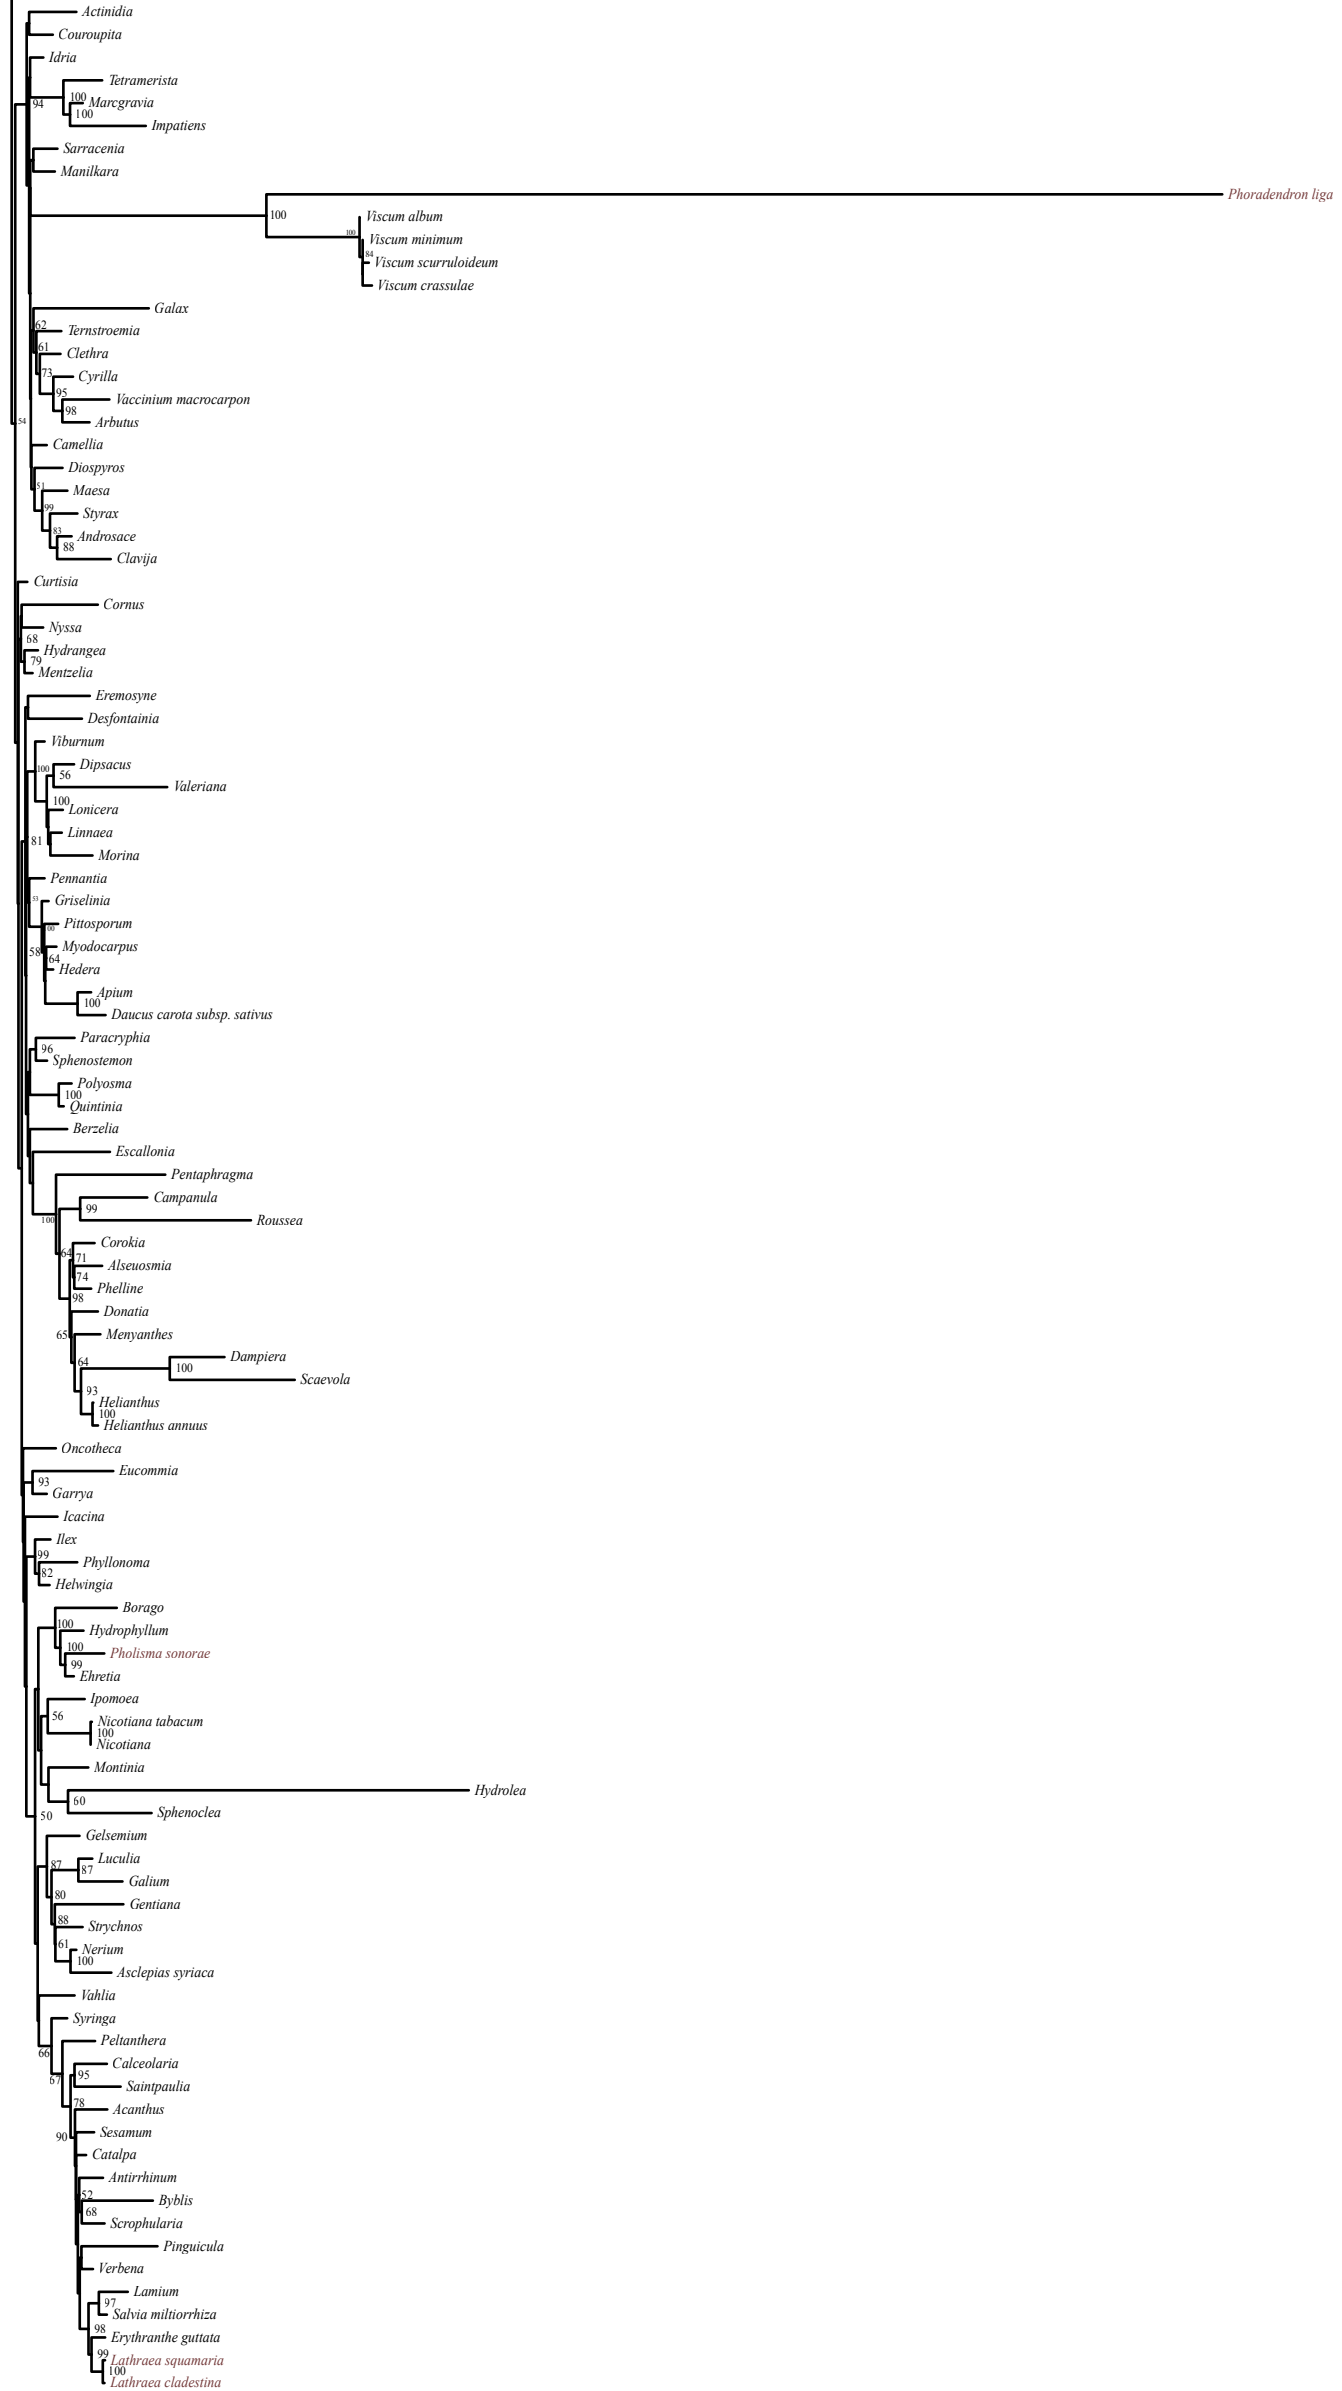

Supplement: 12862_2019_1401_MOESM4_ESM.pdf [file 12862_2019_1401_MOESM4_ESM.pdf]
