# Supplementary material for: Mitochondrial genome evolution in parasitic plants
Source: PubMed Central journal article supplement (PMC6454704; doi:10.1186/s12862-019-1401-8), 2019-04-08
Supplement: 12862_2019_1401_MOESM5_ESM.pdf [file 12862_2019_1401_MOESM5_ESM.pdf]

| RAXML <i>atp1</i>                                                            |                        |                  |           |          |          |           |
|------------------------------------------------------------------------------|------------------------|------------------|-----------|----------|----------|-----------|
| Taxon                                                                        | Substitutions per site | 1-way ANOVA      |           |          |          |           |
| 4 independent groups: non-parasitēs, hemiparasitic, holoparasitic, Viscaceae |                        |                  |           |          |          |           |
| Total number of substitutions (RAXML with Viscaceae)                         |                        |                  |           |          |          |           |
| <b>Data summary</b>                                                          |                        |                  |           |          |          |           |
|                                                                              | Samples                | 1                | 2         | 3        | 4        | Total     |
| <i>Amborella trich</i>                                                       | 0.45                   |                  |           |          |          |           |
| <i>Liriodendron tu</i>                                                       | 0.462761               |                  |           |          |          |           |
| <i>Butomus umbel.</i>                                                        | 0.713119               |                  |           |          |          |           |
| <i>Aegilops speltol</i>                                                      | 0.518501               |                  |           |          |          |           |
| <i>Phoenix dactylj</i>                                                       | 0.476673               |                  |           |          |          |           |
| <i>Vitis vinifera</i>                                                        | 0.517358               | N                | 22        | 4        | 7        | 38        |
| <i>Glycine max</i>                                                           | 0.55606                | Sx               | 12.096349 | 2.128129 | 4.03     | 7.203137  |
| <i>Malus x domest</i>                                                        | 0.533928               | Mean             | 0.549834  | 0.532032 | 0.575714 | 1.440627  |
| <i>Citrullus lanatu</i>                                                      | 0.516275               | Sx2              | 6.725545  | 1.132997 | 2.32304  | 10.449308 |
| <i>Cucurbita pepo</i>                                                        | 0.538396               | Variance         | 0.00355   | 0.00255  | 0.000485 | 0.018068  |
| <i>Ricinus commu</i>                                                         | 0.516152               | Std. Dev.        | 0.059586  | 0.015955 | 0.022026 | 0.134417  |
| <i>Populus tremul</i>                                                        | 0.648369               | Std. Error       | 0.012704  | 0.007978 | 0.008325 | 0.060113  |
| <i>Geranium mad.</i>                                                         | 0.613709               |                  |           |          |          |           |
| <i>Brassica carina</i>                                                       | 0.559698               |                  |           |          |          |           |
| <i>Gossypium hirs.</i>                                                       | 0.530747               |                  |           |          |          |           |
| <i>Vaccinium mac.</i>                                                        | 0.573184               |                  |           |          |          |           |
| <i>Daucus carota</i>                                                         | 0.540606               |                  |           |          |          |           |
| <i>Helianthus ann</i>                                                        | 0.532641               |                  |           |          |          |           |
| <i>Nicotiana tabac</i>                                                       | 0.534591               | Source           | SS        | dF       | MS       | F         |
| <i>Asclepias syriac</i>                                                      | 0.569102               | Treatment        | 3.425     | 3        | 1.142    | 257.94    |
| <i>Salvia miltiorrh</i>                                                      | 0.598394               | [Between groups] |           |          |          | <.0001    |
| <i>Erythraite gutt</i>                                                       | 0.596085               | Error            | 0.151     | 34       | 0.004427 |           |
| <i>Cassitha pubes</i>                                                        | 0.510899               | Ss/BI            |           |          |          |           |
| <i>Krameria lance</i>                                                        | 0.541703               | Total            | 3.575885  | 33       |          |           |
| <i>Oxyris alba</i>                                                           | 0.528879               |                  |           |          |          |           |
| <i>Loranthus euroj</i>                                                       | 0.553731               |                  |           |          |          |           |
| <i>Cytinus hypocis</i>                                                       | 0.582777               |                  |           |          |          |           |
| <i>Cytinus hypocis</i>                                                       | 0.582777               |                  |           |          |          |           |
| <i>Lathraea squam</i>                                                        | 0.599447               |                  |           |          |          |           |
| <i>Lathraea clades</i>                                                       | 0.59445                |                  |           |          |          |           |
| <i>Langsdorffia hy</i>                                                       | 0.578592               |                  |           |          |          |           |
| <i>Cynomorium co</i>                                                         | 0.546648               |                  |           |          |          |           |
| <i>Pholisma sonor</i>                                                        | 0.538226               |                  |           |          |          |           |
| <i>Phoradendron l</i>                                                        | 1.681055               |                  |           |          |          |           |
| <i>Viscum album</i>                                                          | 1.377452               |                  |           |          |          |           |
| <i>Viscum crassul</i>                                                        | 1.382571               |                  |           |          |          |           |
| <i>Viscum scurrul</i>                                                        | 1.380518               |                  |           |          |          |           |
| <i>Viscum minimum</i>                                                        | 1.381541               |                  |           |          |          |           |

| RAXML <i>matR</i>                                                            |                        |                  |           |          |          |          |
|------------------------------------------------------------------------------|------------------------|------------------|-----------|----------|----------|----------|
| Taxon                                                                        | Substitutions per site | 1-way ANOVA      |           |          |          |          |
| 4 independent groups: non-parasitēs, hemiparasitic, holoparasitic, Viscaceae |                        |                  |           |          |          |          |
| Total number of substitutions (RAXML with Viscaceae)                         |                        |                  |           |          |          |          |
| <b>Data summary</b>                                                          |                        |                  |           |          |          |          |
|                                                                              | Samples                | 1                | 2         | 3        | 4        | Total    |
| <i>Amborella trich</i>                                                       | 0.45                   |                  |           |          |          |          |
| <i>Liriodendron tu</i>                                                       | 0.463694               |                  |           |          |          |          |
| <i>Butomus umbel.</i>                                                        | 0.549789               |                  |           |          |          |          |
| <i>Aegilops speltol</i>                                                      | 0.511798               |                  |           |          |          |          |
| <i>Phoenix dactylj</i>                                                       | 0.47909                |                  |           |          |          |          |
| <i>Vitis vinifera</i>                                                        | 0.471638               | N                | 22        | 4        | 7        | 34       |
| <i>Glycine max</i>                                                           | 0.492041               | Sx               | 10.908098 | 1.941477 | 3.665967 | 0.491559 |
| <i>Malus x domest</i>                                                        | 0.490286               | Mean             | 0.495823  | 0.485369 | 0.52371  | 0.491559 |
| <i>Citrullus lanatu</i>                                                      | 0.496434               | Sx2              | 5.417782  | 0.943019 | 1.928959 | 0.24163  |
| <i>Cucurbita pepo</i>                                                        | 0.525366               | Variance         | 0.000443  | 0.000228 | 0.001509 | NA       |
| <i>Ricinus commu</i>                                                         | 0.490335               | Std. Dev.        | 0.021044  | 0.15115  | 0.038852 | NA       |
| <i>Populus tremul</i>                                                        | 0.503155               | Std. Error       | 0.004487  | 0.007557 | 0.014685 | NA       |
| <i>Geranium mad.</i>                                                         | 0.523952               |                  |           |          |          |          |
| <i>Brassica carina</i>                                                       | 0.506726               |                  |           |          |          |          |
| <i>Gossypium hirs</i>                                                        | 0.485895               |                  |           |          |          |          |
| <i>Vaccinium mac.</i>                                                        | 0.499895               |                  |           |          |          |          |
| <i>Daucus carota</i>                                                         | 0.489074               |                  |           |          |          |          |
| <i>Helianthus ann</i>                                                        | 0.492351               |                  |           |          |          |          |
| <i>Nicotiana tabac</i>                                                       | 0.496596               | Source           | SS        | dF       | MS       | F        |
| <i>Asclepias syriac</i>                                                      | 0.502191               | Treatment        | 0.005     | 3        | 0.002    | 2.75     |
| <i>Salvia miltiorrh</i>                                                      | 0.492975               | [Between groups] |           |          |          | 0.06003  |
| <i>Erythraite gutt</i>                                                       | 0.494817               | Error            | 0.019     | 30       | 0.000635 |          |
| <i>Cassitha pubes</i>                                                        | 0.468484               | Ss/BI            |           |          |          |          |
| <i>Krameria lance</i>                                                        | 0.49572                | Total            | 0.024     | 33       |          |          |
| <i>Oxyris alba</i>                                                           | 0.47698                |                  |           |          |          |          |
| <i>Loranthus euroj</i>                                                       | 0.520245               |                  |           |          |          |          |
| <i>Cytinus hypocis</i>                                                       | 0.534492               |                  |           |          |          |          |
| <i>Cytinus hypocis</i>                                                       | 0.534492               |                  |           |          |          |          |
| <i>Lathraea squam</i>                                                        | 0.490664               |                  |           |          |          |          |
| <i>Lathraea clades</i>                                                       | 0.490664               |                  |           |          |          |          |
| <i>Langsdorffia hy</i>                                                       | 0.600034               |                  |           |          |          |          |
| <i>Cynomorium co</i>                                                         | 0.500293               |                  |           |          |          |          |
| <i>Pholisma sonor</i>                                                        | 0.495376               |                  |           |          |          |          |
| <i>Phoradendron liga</i>                                                     | 0.491559               |                  |           |          |          |          |
| <i>Viscum album</i>                                                          | 0.491559               |                  |           |          |          |          |
| <i>Viscum crassul</i>                                                        | 0.491559               |                  |           |          |          |          |
| <i>Viscum scurrul</i>                                                        | 0.491559               |                  |           |          |          |          |
| <i>Viscum minimum</i>                                                        | 0.491559               |                  |           |          |          |          |

| RAXML <i>rps3</i>                                                 |                        |                  |          |          |          |           |
|-------------------------------------------------------------------|------------------------|------------------|----------|----------|----------|-----------|
| Taxon                                                             | Substitutions per site | 1st 1-way ANOVA  |          |          |          |           |
| 3 independent groups: non-parasitēs, hemiparasitic, holoparasitic |                        |                  |          |          |          |           |
| Substitution rates (RAXML without Viscaceae)                      |                        |                  |          |          |          |           |
| <b>Data summary</b>                                               |                        |                  |          |          |          |           |
|                                                                   | Samples                | 1                | 2        | 3        | Total    |           |
| <i>Amborella trich</i>                                            | 0.45                   |                  |          |          |          |           |
| <i>Liriodendron tu</i>                                            | 0.465145               |                  |          |          |          |           |
| <i>Butomus umbel.</i>                                             | 0.596686               |                  |          |          |          |           |
| <i>Aegilops speltol</i>                                           | 0.526784               |                  |          |          |          |           |
| <i>Phoenix dactylj</i>                                            | 0.485985               |                  |          |          |          |           |
| <i>Vitis vinifera</i>                                             | 0.477226               | N                | 19       | 4        | 7        | 30        |
| <i>Glycine max</i>                                                | 0.49928                | Sx               | 8.976709 | 1.991921 | 3.907356 | 14.875986 |
| <i>Malus x domest</i>                                             | 0.49911                | Mean             | 0.472458 | 0.49798  | 0.558194 | 0.495866  |
| <i>Citrullus lanatu</i>                                           | 0.492865               | Sx2              | 4.889454 | 0.993667 | 2.196571 | 8.079692  |
| <i>Cucurbita pepo</i>                                             | 0.514111               | Variance         | 0.036018 | 0.000576 | 0.002585 | 0.024248  |
| <i>Ricinus commu</i>                                              | 0.487673               | Std. Dev.        | 0.189785 | 0.02401  | 0.050842 | 0.155718  |
| <i>Populus tremul</i>                                             | 0.537351               | Std. Error       | 0.04354  | 0.012005 | 0.019217 | 0.02843   |
| <i>Geranium mad.</i>                                              | 0.879598               |                  |          |          |          |           |
| <i>Brassica carina</i>                                            | 0.537274               |                  |          |          |          |           |
| <i>Gossypium hirs.</i>                                            | 0.509638               |                  |          |          |          |           |
| <i>Vaccinium macrocarpon</i>                                      | 0.527862               |                  |          |          |          |           |
| <i>Daucus carota</i>                                              | 0.527862               |                  |          |          |          |           |
| <i>Helianthus annuus</i>                                          | 0.490121               | Source           | SS       | dF       | MS       | F         |
| <i>Nicotiana tabac</i>                                            | 0.501946               | Treatment        | 0.038    | 2        | 0.019    | 0.76      |
| <i>Asclepias syriac</i>                                           | 0.510934               | [Between groups] |          |          |          | 0.477411  |
| <i>Salvia miltiorrh</i>                                           | 0.510934               | Error            | 0.665518 | 27       | 0.024651 |           |
| <i>Erythraite guttata</i>                                         | 0.478239               | Ss/BI            |          |          |          |           |
| <i>Cassitha pubes</i>                                             | 0.500003               | Total            | 0.703    | 29       |          |           |
| <i>Krameria lance</i>                                             | 0.482563               |                  |          |          |          |           |
| <i>Oxyris alba</i>                                                | 0.647872               |                  |          |          |          |           |
| <i>Loranthus euroj</i>                                            | 0.579527               |                  |          |          |          |           |
| <i>Cytinus hypocis</i>                                            | 0.576756               |                  |          |          |          |           |
| <i>Cytinus hypocis</i>                                            | 0.576756               |                  |          |          |          |           |
| <i>Lathraea squam</i>                                             | 0.507129               |                  |          |          |          |           |
| <i>Lathraea clades</i>                                            | 0.508351               |                  |          |          |          |           |
| <i>Langsdorffia hy</i>                                            | 0.567996               |                  |          |          |          |           |
| <i>Cynomorium co</i>                                              | 0.531116               |                  |          |          |          |           |
| <i>Pholisma sonor</i>                                             | 0.519725               |                  |          |          |          |           |
| <i>Phoradendron liga</i>                                          | 1.621477               |                  |          |          |          |           |
| <i>Viscum album</i>                                               | 1.198901               |                  |          |          |          |           |
| <i>Viscum crassul</i>                                             | 1.254727               |                  |          |          |          |           |
| <i>Viscum scurrul</i>                                             | 1.209843               |                  |          |          |          |           |
| <i>Viscum minimum</i>                                             | 1.203001               |                  |          |          |          |           |

| RAXML <i>all mt genes</i>                                                    |                   |                  |          |          |          |          |
|------------------------------------------------------------------------------|-------------------|------------------|----------|----------|----------|----------|
| Taxon                                                                        | Substitution rate | 1-way ANOVA      |          |          |          |          |
| 4 independent groups: non-parasitēs, hemiparasitic, holoparasitic, Viscaceae |                   |                  |          |          |          |          |
| Substitution rates (RAXML with Viscaceae)                                    |                   |                  |          |          |          |          |
| <b>Data summary</b>                                                          |                   |                  |          |          |          |          |
|                                                                              | Samples           | 1                | 2        | 3        | 4        | Total    |
| <i>Amborella trich</i>                                                       | 0.45              |                  |          |          |          |          |
| <i>Liriodendron tu</i>                                                       | 0.460027          |                  |          |          |          |          |
| <i>Butomus umbel.</i>                                                        | 0.546915          |                  |          |          |          |          |
| <i>Aegilops speltol</i>                                                      | 0.528624          |                  |          |          |          |          |
| <i>Phoenix dactylj</i>                                                       | 0.491331          |                  |          |          |          |          |
| <i>Vitis vinifera</i>                                                        | 0.48716           | N                | 22       | 4        | 7        | 38       |
| <i>Glycine max</i>                                                           | 0.51054           | Sx               | 11.329   | 2.031278 | 3.8065   | 6.487949 |
| <i>Malus x domest</i>                                                        | 0.502548          | Mean             | 0.5149   | 0.50782  | 0.5437   | 1.29759  |
| <i>Citrullus lanatu</i>                                                      | 0.500209          | Sx2              | 5.85     | 1.0322   | 2.0736   | 8.551823 |
| <i>Cucurbita pepo</i>                                                        | 0.520435          | Variance         | 0.000873 | 0.000259 | 0.000618 | 0.033282 |
| <i>Ricinus commu</i>                                                         | 0.501963          | Std. Dev.        | 0.029549 | 0.016079 | 0.0248   | 0.182432 |
| <i>Populus tremul</i>                                                        | 0.52545           | Std. Error       | 0.0063   | 0.007862 | 0.009393 | 0.081586 |
| <i>Geranium mad.</i>                                                         | 0.592562          |                  |          |          |          |          |
| <i>Brassica carina</i>                                                       | 0.525093          |                  |          |          |          |          |
| <i>Gossypium hirs</i>                                                        | 0.511083          |                  |          |          |          |          |
| <i>Vaccinium mac.</i>                                                        | 0.517457          |                  |          |          |          |          |
| <i>Daucus carota</i>                                                         | 0.531828          |                  |          |          |          |          |
| <i>Helianthus ann</i>                                                        | 0.52933           |                  |          |          |          |          |
| <i>Nicotiana tabac</i>                                                       | 0.507866          | Source           | SS       | dF       | MS       | F        |
| <i>Asclepias syriac</i>                                                      | 0.522195          | Treatment        | 2.629    | 3        | 0.876    | 191.07   |
| <i>Salvia miltiorrh</i>                                                      | 0.548203          | [Between groups] |          |          |          | <.0001   |
| <i>Erythraite gutt</i>                                                       | 0.518825          | Error            | 0.156    | 34       | 0.004587 |          |
| <i>Cassitha pubes</i>                                                        | 0.484363          | Ss/BI            |          |          |          |          |
| <i>Krameria lance</i>                                                        | 0.513483          | Total            | 2.785    | 37       |          |          |
| <i>Oxyris alba</i>                                                           | 0.512532          |                  |          |          |          |          |
| <i>Loranthus euroj</i>                                                       | 0.55266           |                  |          |          |          |          |
| <i>Cytinus hypocis</i>                                                       | 0.569217          |                  |          |          |          |          |
| <i>Cytinus hypocis</i>                                                       | 0.561156          |                  |          |          |          |          |
| <i>Lathraea squam</i>                                                        | 0.521048          |                  |          |          |          |          |
| <i>Lathraea clades</i>                                                       | 0.522013          |                  |          |          |          |          |
| <i>Langsdorffia hy</i>                                                       | 0.569032          |                  |          |          |          |          |
| <i>Cynomorium co</i>                                                         | 0.5209            |                  |          |          |          |          |
| <i>Pholisma sonor</i>                                                        | 0.511378          |                  |          |          |          |          |
| <i>Phoradendron l</i>                                                        | 1.621477          |                  |          |          |          |          |
| <i>Viscum album</i>                                                          | 1.198901          |                  |          |          |          |          |
| <i>Viscum crassul</i>                                                        | 1.254727          |                  |          |          |          |          |
| <i>Viscum scurrul</i>                                                        | 1.209843          |                  |          |          |          |          |
| <i>Viscum minimum</i>                                                        | 1.203001          |                  |          |          |          |          |
